# Operationalizing ecological connectivity in spatial conservation planning with Marxan Connect

\*Rémi M. Daigle, Dalhousie University, Department of Oceanography, 1355 Oxford Street, Halifax, NS, Canada, B3H 4R2 and Université Laval, Département de biologie, 1045, av. de la Médecine, Québec, QC, Canada, G1V 0A6

Anna Metaxas, Dalhousie University, Department of Oceanography, 1355 Oxford Street, Halifax, NS, Canada, B3H 4R2

Arieanna Balbar, Dalhousie University, Department of Oceanography, 1355 Oxford Street, Halifax, NS, Canada, B3H 4R2

Jennifer McGowan, Centre for Biodiversity and Conservation Science, School of Biological Sciences, University of Queensland, St. Lucia, QLD 4072, Australia.

Eric A. Treml, School of Life and Environmental Sciences, Deakin University, Waurn Ponds, VIC 3216, Australia.

Caitlin D. Kuempel, Centre for Biodiversity and Conservation Science, School of Biological Sciences, University of Queensland, St. Lucia, QLD 4072, Australia.

Hugh P. Possingham, The Nature Conservancy, South Brisbane, Queensland 4101, Australia.

Maria Beger, School of Biology, Faculty of Biological Sciences, University of Leeds, LS2 9JT, UK and Centre for Biodiversity and Conservation Science, School of Biological Sciences, University of Queensland, Brisbane, QLD 4072, Australia.

\* Corresponding Author: [remi.daigle@dal.ca](mailto:remi.daigle@dal.ca)

**Running Head** (<45 characters): Operationalizing connectivity in spatial planning

**Keywords:** Connectivity; Conservation; Marxan; Movement Ecology; Spatial Planning; Structural connectivity

24 **Abstract:**

- 25 1. Globally, protected areas are being established to protect biodiversity and to promote ecosystem  
26 resilience. The typical spatial conservation planning process leading to the creation of these protected  
27 areas focuses on representation and replication of ecological features, often using decision support  
28 systems such as Marxan. Unfortunately, Marxan currently requires manual input or specialised scripts  
29 to explicitly consider ecological connectivity, a property critical to metapopulation persistence and  
30 resilience.
- 31 2. “Marxan Connect” is a new open source, open access Graphical User Interface (GUI) designed to assist  
32 conservation planners in the systematic operationalization of ecological connectivity in protected area  
33 network planning.
- 34 3. Marxan Connect is able to incorporate estimates of demographic connectivity (*e.g.* derived from  
35 tracking data, dispersal models, or genetics) or structural landscape connectivity (*e.g.* isolation by  
36 resistance). This is accomplished by calculating metapopulation-relevant connectivity metrics (*e.g.*  
37 eigenvector centrality) and treating those as conservation features, or using the connectivity data as a  
38 spatial dependency amongst sites to be included in the prioritization process.
- 39 4. Marxan Connect allows a wide group of users to incorporate directional ecological connectivity into  
40 conservation plans. The least-cost conservation solutions provided by Marxan Connect, combined with  
41 ecologically relevant post-hoc testing, are more likely to support persistent and resilient metapopulations  
42 (*e.g.* fish stocks) and provide better protection for biodiversity than if connectivity is ignored.

## 43 Introduction

44 Connectivity, in its most general form, refers to the exchange of individuals (including genes, traits, disease,  
45 etc.), energy or materials among habitat patches, populations, communities or ecosystems. Maintaining  
46 connectivity can improve population resilience to perturbations, increase metapopulation viability, promote  
47 genetic diversity and maintain energetic pathways among ecosystems (Palumbi 2003; Figueira & Crowder  
48 2006; Lowe & Allendorf 2010). Connectivity also appears at the forefront of global international conservation  
49 policy, so as Aichi Target 11, which commits 197 countries to establishing “effective, representative, and  
50 well-connected” networks of reserves by 2020 (UNEP 2010).

51 There are many metrics and methods to evaluate the connectivity of sea/landscapes and these can be used  
52 to assess networks of protected areas and influence spatial conservation planning in the future (Saura &  
53 Pascual-Hortal 2007; Beger *et al.* 2010a; Chollett *et al.* 2017; D’Aloia *et al.* 2017; Zeller *et al.* 2018). The  
54 quantity and quality of empirical data used to calculate connectivity have been growing rapidly in the last  
55 few years (Kool, Moilanen & Treml 2013; Hussey *et al.* 2015; Magris *et al.* 2018; Zeller *et al.* 2018). In  
56 turn, methods for estimating ecological connectivity are also advancing, and new conservation planning tools  
57 are quickly emerging to capitalize on these new data and methods (Saura & Pascual-Hortal 2007; Beger *et al.*  
58 *et al.* 2010b; White *et al.* 2014). Examples of connectivity data that have been incorporated in conservation  
59 applications include: gene flow (Beger *et al.* 2014; Marrotte *et al.* 2017), dynamic distributions and migratory  
60 bottlenecks on migratory pathways (Iwamura *et al.* 2013; Runge *et al.* 2016), maximizing larval flow (Magris  
61 *et al.* 2016; D’Aloia *et al.* 2017), ontogenetic shifts in habitat use (Brown *et al.* 2016; Weeks 2017), ensuring  
62 the movement of adult individuals pathways (Beger *et al.* 2015; Mazar *et al.* 2016; Pereira, Saura & Jordán  
63 2017; Zeller *et al.* 2018), and maintaining fisheries benefits (Daigle, Monaco & Elgin 2017; Krueck *et al.*  
64 2017). Despite these efforts, connectivity is not commonly being incorporated in on-the-ground decision  
65 making for planning (Beger *et al.* 2010a; Barnes *et al.* 2018; Balbar, unpublished data). This is largely  
66 because connectivity metrics are not well defined or standardized, practitioners often lack confidence in the  
67 data or the expertise to work with them, and approaches to explicitly incorporate connectivity patterns in  
68 spatial planning are rare.

69 Spatial conservation planning is an approach that guides the allocation of conservation resources to areas  
70 identified as important for biodiversity whilst minimising the conservation impact on resource users (Margules  
71 & Pressey 2000; Moilanen, Wilson & Possingham 2009; Wilson, Cabeza & Klein 2009). The process of spatial  
72 planning demands setting broad goals, which can be turned into quantifiable objectives that lead to the  
73 conservation of biodiversity (Tear *et al.* 2005) and which, in turn, link back to actions, costs and feasibility  
74 (Wilson *et al.* 2007). Spatial planning often relies on the use of decision-support software (*e.g.* Marxan or  
75 Zonation) to help decide the location and timing of actions (*e.g.* establishing protected areas) to best achieve  
76 conservation objectives. These tools are primarily used to develop representative and cost-efficient conservation  
77 plans by meeting targets for species or habitats, with the consideration of connectivity patterns primarily  
78 expressed by prioritising adjacent or contiguous sites. To advance the inclusion of ecological connectivity  
79 into the spatial planning process, technical documentation, best-practice guidelines and user-friendly tools  
80 are needed. Knowing how to best identify, evaluate, and treat connectivity data to meet different objectives  
81 within a given spatial planning framework is important to better capture key ecological processes in planning.

82 Here, we outline potential workflows of realising connectivity in spatial planning, including the treatment of  
83 various data formats, key decision points that link back to objectives, types of data related to connectivity,

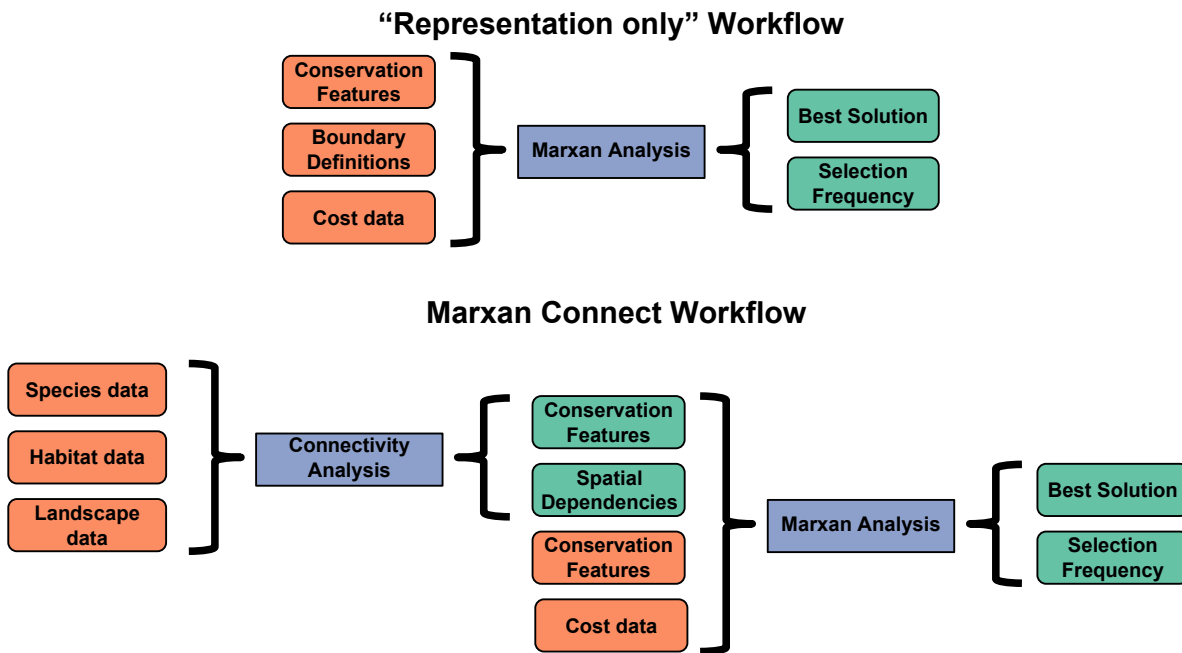

Figure 1: Comparison of workflows between the “representation only” approach to Marxan and “Marxan Connect.” Marxan Connect facilitates the use of connectivity data, derived from tagging data, genetics, dispersal models, resistance models, or geographic distance, by producing connectivity metrics and connectivity strengths (*i.e.* spatial dependencies that are used in the place of boundary definitions) before running Marxan. These connectivity metrics and linkage strengths are then used as inputs (connectivity-based conservation features or spatial dependencies) in the traditional Marxan workflow. The cost data in the traditional Marxan analysis refers to the cost of protecting a planning unit (*i.e.* opportunity cost), not the cost to traverse a landscape.

84 evaluation and post-hoc analysis. We do so in the context of the widely used spatial planning tool Marxan,  
 85 which aims to represent biodiversity whilst minimizing overall cost (Ball, Possingham & Watts 2009). We  
 86 then introduce a new open source and open access tool called Marxan Connect to help users operationalize  
 87 these concepts within Marxan. Our objective is to enable an overview of the selection and treatment of  
 88 connectivity data to encourage its use in spatial conservation planning.

89

90 **Box 1:** A primer for spatial conservation planning with Marxan Marxan uses a simulated  
 91 annealing algorithm to find good solutions to the “minimum set” problem. In the minimum set  
 92 problem, the user specifies an amount of each conservation feature  $j$  that needs to be conserved,  
 93 or conservation targets ( $T_j$ ), for each conservation feature. The basic minimum set problem is an  
 94 integer linear programming problem and does not consider connectivity:

$$\text{minimize } \sum_{i=1}^N c_i x_i, \text{ given that we should meet all targets}$$

$$\sum_{i=1}^N x_i r_{ij} \geq T_j, \text{ for all features } j,$$

95 where  $N$  is the number of planning units,  $c_i$  is the cost of planning unit  $i$ ,  $r_{ij}$  is the amount of  
96 feature  $j$  in planning unit  $i$ , and  $x_i$  is a control variable which has the value of 1 for selected sites  
97 and 0 for unselected sites. It is usually desirable to include some basic spatial properties of a  
98 protected area system such as geographic proximity or adjacency information between planning  
99 units to help minimize costs or maximize clumping of a protected area system. For example, if  
100 the common boundary between every pair of planning units is known, then the minimum set  
101 problems can be extended to include a term for the boundary length of the reserve system and an  
102 effort made to minimise it:

$$\text{minimize } \sum_{i=1}^N c_i x_i + b \sum_{i=1}^N \sum_{h=1}^N x_i (1 - x_h) cv_{ih}, \text{ given that we should meet all targets}$$

$$\sum_{i=1}^N x_i r_{ij} \geq T_j, \text{ for all features } j,$$

103 where  $b$  is the boundary length modifier (BLM), and  $cv_{ih}$  represents the cost of a boundary and  
104 is typically the length of the physical boundary between sites  $i$  and  $h$ . Costs ( $c_i$ ) in Marxan often  
105 pertain to socio-economic implications of protecting a site, such as management or opportunity  
106 costs. For more information see Ball et al. (2009) and Ardron et al. (2010). Key terms and  
107 definitions:

- 108 • **Planning area:** the spatial domain over which the planning process occurs. This is  
109 synonymous with terms “domain” or “extent” or “study area” in other fields. This area is  
110 subdivided into smaller “Planning Units”.
- 111 • **Planning unit:** spatial units within the entire planning area (*i.e.* domain, or study area),  
112 which can be defined using regular gridded (*e.g.* hexagonal) or using landscape features-based  
113 (*e.g.* reefs, water catchments) as in Marxan.
- 114 • **Boundary Length:** the shared boundary length between adjacent planning units.
- 115 • **Boundary Length Modifier (BLM):** a weighting parameter to ‘tune’ the influence of  
116 the boundaries. The BLM helps achieve “clumped” solutions by reducing the overall edge to  
117 area ratio. A higher BLM value results in a more ‘clumped’ Marxan solution.
- 118 • **Conservation feature:** the features (*e.g.* habitats, species, processes) for which a target is  
119 set.
- 120 • **Conservation target:** the minimum quantity or proportion of the conservation feature in  
121 the study area to be included in solutions.
- 122 • **Solution:** a binary output of Marxan reflecting whether a planning unit is selected (1) or  
123 not selected (0) as part of the conservation plan.
- 124 • **Selection Frequency:** the summed solution output of Marxan reflecting how many times  
125 a planning unit was selected across runs

126

## 127 Understanding connectivity data

128 One of the challenges associated with integrating ecological connectivity in spatial planning is the wide  
129 variety of entities that move (*e.g.* organism, gene, pollutant) and movement processes (*e.g.* migration route,  
130 larval dispersal, multi-generational gene flow, carbon flux). While there are many types of data sources,  
131 connectivity data are often stored as matrices, where donor (or source) sites are rows, and the recipient (or  
132 destination) sites are columns. Alternatively, connectivity data may be stored in an edge list where the first  
133 column contains the donor site IDs, the second column contains the recipient site IDs, and the third column  
134 contains the connectivity value. Below, we review a few of the most common data sources organized by their  
135 treatment in Marxan Connect. Additional details on data format, types, mathematical representations and  
136 associated assumptions can be found on the Marxan Connect tool website, [marxanconnect.ca](http://marxanconnect.ca).

## 137 Landscape-based estimates of connectivity

138 Some spatial planners may have access to detailed connectivity information based on demographic data  
139 (See “Demographic estimates of connectivity” section below). In these cases, Marxan Connect can generate  
140 estimates of connectivity strength (*e.g.* spatial isolation) based either on the Euclidean distance between  
141 habitats, or isolation by resistance (McRae & Nürnberger 2006). These landscape-based connectivity estimates  
142 are often more limited in their applicability than demographic data (*e.g.* self-recruitment), but require less  
143 data.

## 144 Linkages across a habitat matrix

145 The structure and spatial configuration of the land- or sea-scape (*i.e.* habitat type, size, and spacing) can  
146 impede or facilitate the movement of organisms. The rate at which impediment or facilitation occurs has  
147 been defined as the strength of landscape connectivity (Tischendorf & Fahrig 2000). The impediment or  
148 facilitation (*i.e.* resistance or cost to traverse landscape) posed by habitat types can be estimated from  
149 tracking data, genetic data, expert opinion, or habitat suitability models for species-centric approaches (Bunn,  
150 Urban & Keitt 2000; Urban & Keitt 2001; Ricketts 2001; Zeller, McGarigal & Whiteley 2012). For a habitat  
151 or multi-species centric approach, resistance can also be estimated from the similarity in environmental  
152 variables (*e.g.* land cover) or that of species assemblages (Schumaker 1996). From this resistance surface, it is  
153 possible to estimate the rate of movement of organisms across the landscape based on the spatial arrangement  
154 of habitat patches using various methods such as least-cost path analysis, and current density approaches  
155 (Fall *et al.* 2007; Rayfield, Fortin & Fall 2010; Koen *et al.* 2014). While these methods are conceptually  
156 similar, they produce qualitatively different connectivity estimates and may be difficult to validate (Saura &  
157 Pascual-Hortal 2007; Rayfield, Fortin & Fall 2010; Zeller *et al.* 2018).

158 The conservation implications of these differences in connectivity have not been fully explored in the context  
159 of spatial planning. While methods based on Euclidean distance can be species non-specific, resistance-based  
160 models necessarily focus on specific species (Ricketts 2001). However, some features of the landscape (*i.e.*  
161 calculated using the multi-species approach) may have different, but important uses for multiple species. For  
162 example, current density is a metric adopted from electrical circuit theory which, in movement ecology, is  
163 intended to represent the prevalence of movement of organisms across a landscape. However, some species

164 (amphibians and reptiles) may use areas of high current density as movement pathways while others (fishers -  
165 *Martes pennanti*) use these areas as home ranges (Koen *et al.* 2014).

## 166 Demographic estimates of connectivity

167 Whether the movement of ‘individual’ organisms, particles of detritus or pollutants are being directly measured  
168 (tagging and tracking) or estimated (genetics or models), Marxan Connect treats these data as “demographic  
169 connectivity”(See [marxanconnect.ca](http://marxanconnect.ca) for more details on the mathematical representations of connectivity  
170 data). The strength of connectivity is measured as a probability or an absolute amount.

## 171 Tagging and Tracking

172 Movement ecology has seen profound advances over the last decades arising from the ability to identify and  
173 track individuals and thus understand the movement of organisms in space and time (Hussey *et al.* 2015).  
174 Traditionally, individual organisms have been identified using scarring, banding, tagging, radiotelemetry  
175 collars, passive integrated transponder devices (PIT tags), otolith/statolith microchemical signatures, or  
176 other approaches that allow an observer to track the movement of organisms through a landscape (Scott 1942;  
177 Thomas & Marburger 1964; Dunn & Gipson 1977; Twigg 1978; McNeil & Crossman 1979; Whitfield Gibbons  
178 & Andrews 2004). The advent of Global Positioning System (GPS) tags, satellite communication, and other  
179 forms of data relay provide opportunities to collect tracking data at higher spatiotemporal resolution and on a  
180 wider range of organisms, such as long-distance migratory species (Voegeli *et al.* 2001; Cagnacci *et al.* 2010).

181 Regardless of the approach, marking and tagging observations typically consist of a sequence of times and  
182 locations at which an individual was observed. The sequence often records numerous processes including  
183 ontogenetic movements, foraging, seasonal migrations, etc. The data can be used in spatial planning for  
184 objectives related to habitat use (*e.g.* identifying core foraging areas), movement pathways (*e.g.* finding  
185 migration routes) and species demography (*e.g.* disease spread through a population; McGowan *et al.* 2017b).  
186 Since tagging or tracking data are typically collected from relatively few individuals, they are often spatially  
187 biased and do not record multi-generational variation in movement.

## 188 Genetic approaches for estimating ecological connectivity

189 Genetic approaches have long been used to estimate the degree to which populations have diverged, and  
190 the degree to which gene flow via dispersal or migration influences this divergence (Palumbi 2003). As  
191 molecular techniques have changed, divergence and gene flow can be now be quantified at much finer spatial  
192 and temporal scales (Manel & Holderegger 2013; Hand *et al.* 2015). The integration of this fine-scale  
193 genetic information is being proposed as central to conservation and management efforts, despite technical  
194 and conceptual challenges (Beger *et al.* 2014). Generally, assignment methods are being used to develop  
195 estimates of ecological connectivity at the scale of populations (*e.g.*, using Structure Pritchard, Stephens &  
196 Donnelly 2000), whereby individuals are ‘assigned’ back to the population of origin. Similarly, parent-offspring  
197 assignments can be developed based on DNA fingerprinting to identify realised dispersal events over a single  
198 dispersal event (*e.g.* Saenz-Agudelo *et al.* 2009). In both cases, ecological, or demographically-significant,  
199 connectivity estimates between conservation planning units (and/or populations) can be estimated, if sampling



200 is thorough and consistent with the planning unit structure. The result of these genetic approaches is often  
201 a migration matrix representing the likelihood that individuals or genotypes found at some destination  
202 populations came from the suite of sampled source populations. Unfortunately, these data are expensive  
203 to collect at the scale and scope appropriate for conservation applications, and appropriately interpreting  
204 the connectivity results is often highly context dependent. To date, the few published academic studies  
205 attempting this have struggled with significant compromises in taxonomic coverage, geographic extent, and  
206 alignment with the planning process (Harrison *et al.* 2012; *e.g.* Beger *et al.* 2014).

## 207 Individual-based models of movement or dispersal

208 Models of movement for individual organisms can be very useful in estimating connectivity. These models are  
209 typically based on the physical environment (*e.g.* ocean currents) and behavioural (*e.g.* resource selection)  
210 processes which influence movement. To model the movement of materials or individuals through land and  
211 seascapes, advection-diffusion models are often used as they can efficiently capture the physical fluid-like  
212 transport through these environments, including turbulence (Metaxas 2001), and other biological traits such  
213 as behaviour and duration of the dispersal phase (Roughgarden, Gaines & Possingham 1988; Cowen *et al.*  
214 2000; Bode, Bode & Armsworth 2006; Paris, Chérubin & Cowen 2007; Metaxas & Saunders 2009; Trembl  
215 *et al.* 2015; Daigle, Chassé & Metaxas 2016). In general, these modelling approaches are used to calculate  
216 the probability of exchange of individuals between habitat patches. Particle tracking approaches link source  
217 populations to destinations and vice versa allowing one to calculate the probability of linking any source to  
218 any destination and vice versa. These probabilities can then be used as the connectivity strength. Behaviour  
219 motivated movement requires some specific knowledge of the species being modelled. This behaviour can  
220 be based on resource availability (Chetkiewicz & Boyce 2009), predator avoidance (Bracis 2015), or other  
221 environmental cues (Daigle & Metaxas 2012; Zeller *et al.* 2018). While it is computationally feasible to scale  
222 up these models, it is often difficult to appropriately validate these complex models at the broad-scale most  
223 relevant to area-based management.

## 224 Using connectivity data in spatial planning

225 In addition to the often used “rules of thumb” for connectivity which guide sizing and spacing of marine  
226 protected areas (Mora *et al.* 2006; Smith & Metaxas 2018), there are several different methods to directly  
227 incorporate connectivity data into spatial planning tools. For Marxan specifically, these include: 1) treating  
228 connectivity properties of planning units as conservation features (continuous or discrete) for which a target  
229 is set; 2) including connectivity strengths among planning units as spatial dependencies within the objective  
230 function; 3) treating connectivity properties of planning units as a connectivity cost; and 4) customizing the  
231 objective function to incorporate connectivity performance metrics. Methods 1) and 2) are fully implemented  
232 within Marxan Connect (Figure 2) while 3) is supported, but not facilitated for reasons described below.  
233 Method 4) is currently an area of active research not yet implemented. We note that in the following sections,  
234 our objective is to identify and discuss different treatments of connectivity data. We follow up with notes  
235 on making decisions related to data or methods, and we stress the importance of post-hoc evaluations in  
236 separate sections below. Our objective is not to be prescriptive about “best practices” although we do offer  
237 some insights where appropriate.



## 238 Connectivity as conservation features

239 A simple and accessible way to integrate connectivity data into spatial planning is to treat it as a conservation  
240 feature, such that  $r_{ij}$  is the amount of connectivity feature  $j$  (e.g. reproductive outflux) in planning unit  $i$ .  
241 In the classical minimum set problem (i.e. Marxan), a target is set for each feature,  $T_j$ , (e.g. 50%) and the  
242 reserve system needs to contain at least that amount. This method can incorporate continuous or discrete  
243 conservation features (Figure 2). Examples of conservation targets best represented as continuous data include  
244 patch-level self-recruitment values (range between 0 and 1) or centrality measures (White *et al.* 2014; D’Aloia  
245 *et al.* 2017; Magris *et al.* 2018). In this treatment, a metric that represents the process of connectivity  
246 across the entire planning area receives a target. Definitions and potential conservation objectives for each  
247 connectivity based conservation feature available in Marxan Connect can be found on [marxanconnect.ca](http://marxanconnect.ca).

248 To increase the probability that the connectivity process is maintained, and that the spatial conservation  
249 plan is influenced by the conservation feature, a target higher than that of most other conservation features  
250 should be set. We suggest using a tunable ‘constraint’, a connectivity target multiplier ( $C$ ), as a way to  
251 determine the higher target for connectivity-based conservation features (Figure 2 & 3). The target for the  
252 connectivity-based conservation feature,  $T_c$ , would then be:

$$T_c = T_j * C$$

253 with  $T_j$  being a typical conservation target for features not related to connectivity. An appropriate value for  
254  $C$  can be determined by using a cost trade-off curve, similar to calibrating the BLM, where one would test  
255 the sensitivity of cost of the best solution and the total summed metric. It is worth noting that the BLM may  
256 interact with  $C$ . The value of  $C$  could be chosen as the divergent point, where the greatest increase in the  
257 connectivity metric is achieved for a relatively small increase in cost. However, the preferred approach would  
258 be to establish conservation targets leading to a reserve network design which meets ecologically relevant  
259 conservation objective(s), such as population viability or a within network metapopulation growth rate  $> 1$   
260 (See “Post-hoc evaluation” section for more details).

261 In contrast, conservation targets set for discretized connectivity conservation features  $X_j$  can capture different  
262 levels of importance to connectivity amongst sites (Álvarez-Romero *et al.* 2018; Figure 2). To create a  
263 discrete feature, threshold value(s) must be chosen from the range of the continuous connectivity metric,  
264 ideally after ecological assessment or sensitivity analysis. The planning units that meet the threshold(s) are  
265 then discretized into unique features for which a target is set (Figure 2). Similarly, this type of threshold  
266 setting is often used with species distribution models, where each planning unit is assigned a probability of  
267 species occurrence, and a threshold value is used to convert these continuous distribution data to a binary  
268 map (presence vs absence or suitable vs unsuitable) to represent a particular species as a conservation feature  
269 (e.g. Minor *et al.* 2008). When appropriate, discrete and very high priority planning units could alternately  
270 be “locked-in” to the final solution to guarantee their inclusion. One disadvantage of setting a connectivity  
271 metric as a conservation feature is where the benefits of that connectivity conservation features are highly  
272 dependent on the final set of actions. For example, this approach currently does not allow the iterative  
273 recalculation of the metric as sites are added to the solution.

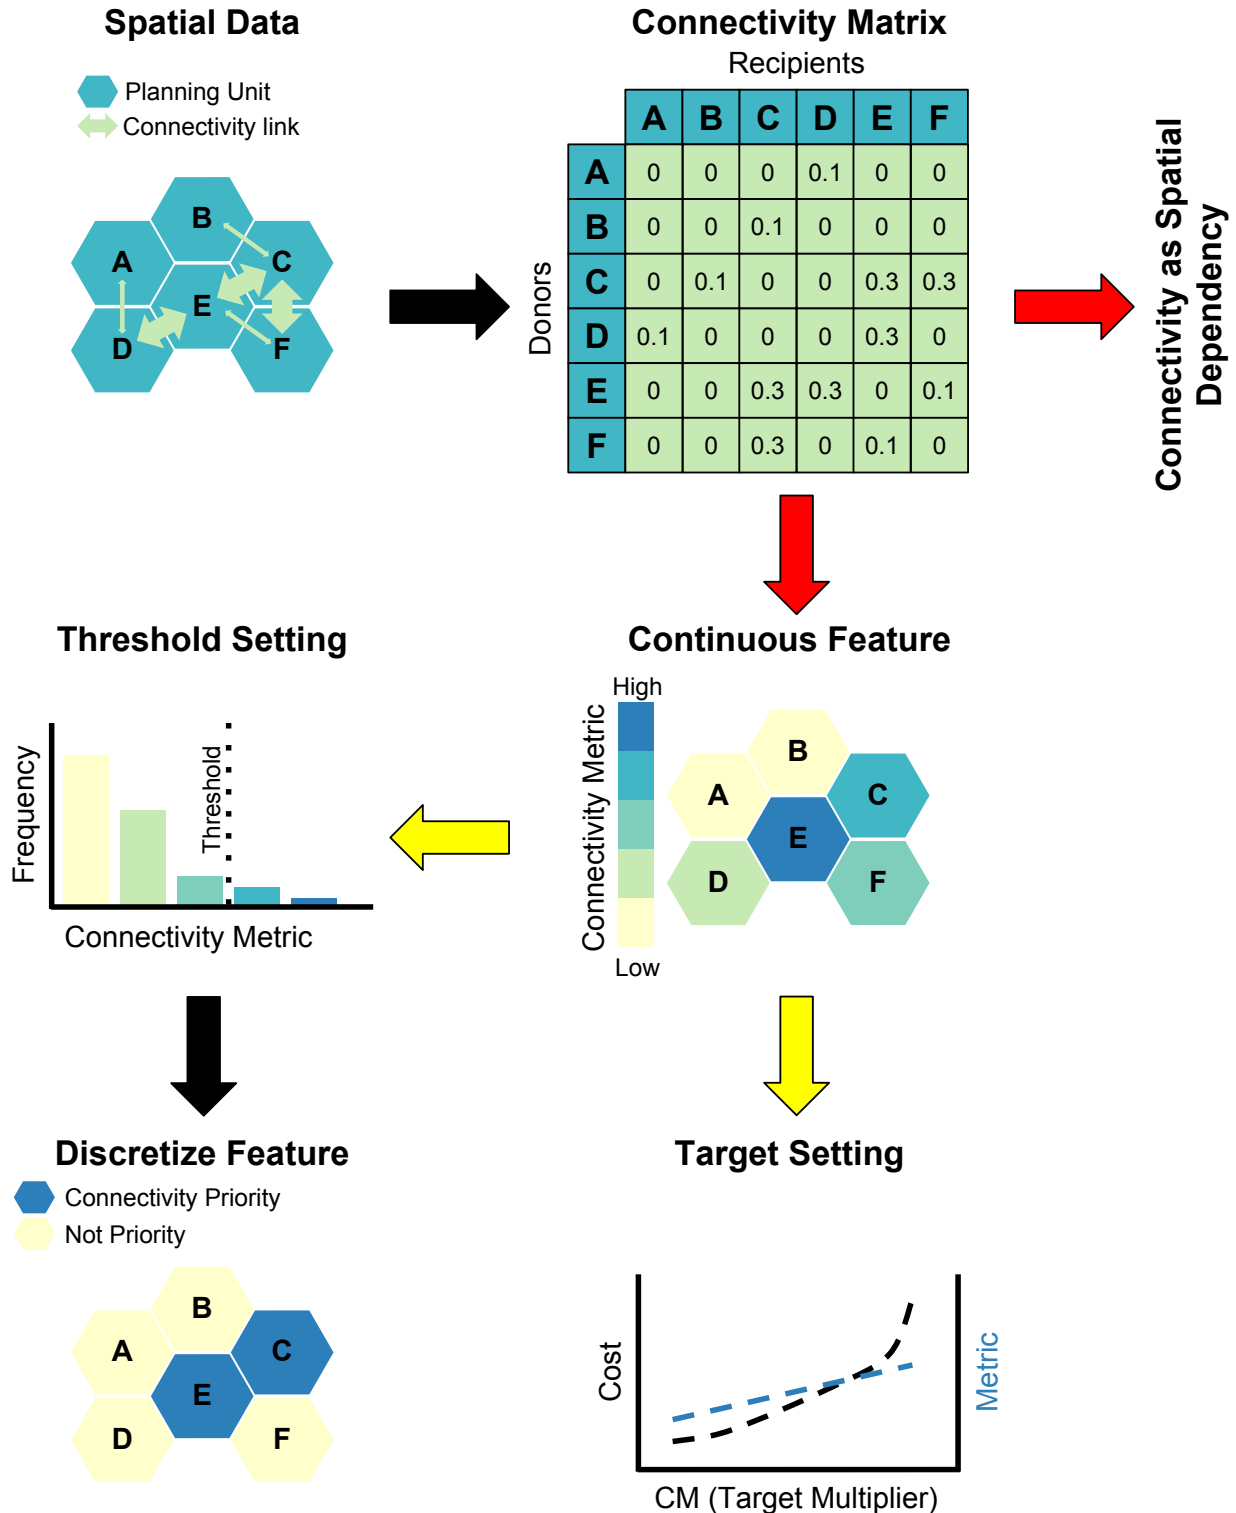

Figure 2: Data processing workflow for three possible methods for using raw connectivity data in spatial prioritization: 1) Connectivity as Spatial Dependency in the objective function (Raw Data -> Connectivity Matrix -> Connectivity as Spatial Dependency), 2) Continuous conservation features (Raw Data -> Connectivity Matrix -> Continuous Metrics -> Target Setting), or 3) Discrete conservation features (Raw Data -> Connectivity Matrix -> Continuous Metrics -> Threshold Setting -> Discrete Metrics). Coloured Arrows indicate important decision points. Red arrows indicate the conservation feature vs connectivity strength method decision point and yellow arrows indicate the continuous vs discrete conservation feature decision point.

## 274 **Connectivity as spatial dependencies in the objective function**

275 Another approach to incorporate connectivity in Marxan is using the directional connectivity-based data to  
276 inform the boundary cost ( $cv_{ih}$ ). This cost signifies the penalty associated with protecting one site but not  
277 other sites to which it is connected (Beger *et al.* 2010b). Here, a directional connectivity dataset is used to  
278 parameterize the boundary cost between all pairs of planning units (including non-adjacent units) and set  
279 the importance of incorporating connectivity with the BLM (or  $b$  in the equation in the “A spatial planning  
280 primer” section), also called “Connectivity Strength Modifier” (CSM) (Beger *et al.* 2010b). Increasing the  
281 BLM reduces the edge to area ratio by minimizing costs associated with unprotected adjacent boundaries;  
282 similarly, increasing the BLM in the connectivity context (*i.e.* CSM) will reduce the amount of leakage from  
283 the network (*i.e.* amount lost from the network) by minimizing costs associated with unprotected connectivity  
284 linkages, and thus maximising connectivity strengths across the entire Marxan solution.

285 Connectivity estimates as spatial dependencies in the objective function have been used to design marine  
286 protected area (MPA) networks in the Coral Triangle (Beger *et al.* 2010b, 2015). This approach can maximize  
287 the within-network connectivity, and may improve the metapopulation growth rate and other performance  
288 metrics. In Marxan Connect, one can combine the use of connectivity as spatial dependencies with a locked-in  
289 “Focus Area” (*e.g.* an existing protected area) to generate candidate stepping stones. However, the method  
290 will exclude isolated sites from the final solution unless these are included using other methods (*e.g.* a  
291 conservation feature for an isolated site which happens to contain a unique species).

## 292 **Connectivity as a Cost**

293 A common approach to attributing costs in Marxan is to use inverse values as a treatment of the cost to be  
294 minimized. For example, such an approach might take the distance of a planning unit to the nearest port as  
295 a proxy of the cost to coastal fishing industries when establishing MPAs (Maina *et al.* 2015; Mazor *et al.*  
296 2016; McGowan *et al.* 2017a). Here, the planning units closer to shore will be less costly than those farther  
297 offshore as the distance grows. Thus, an inverse distance cost makes the planning units closer to shore more  
298 expensive and less desirable for selection than those farther offshore. A more recently proposed method is to  
299 use connectivity as the cost to be minimized in the Marxan objective function. For example, Weeks (2017)  
300 used a “seascape connectivity cost” representing the inverse of the connectivity, expressed as the distance  
301 between adult habitat to nursery habitat. A disadvantage of the “connectivity as a cost” approach is that it  
302 precludes the consideration of other important socio-economic costs in the analysis, which are crucial for  
303 reducing conflicts with resource users and increasing the cost-effectiveness of implementation and management  
304 (Ban and Klein 2009). Further, this approach is not ideal since each planning unit’s contribution to the  
305 connectivity of the entire system relies on whether other sites are “in” or “out” of the reserve system.

## 306 **Connectivity-based objective function**

307 Where the goal of including connectivity data into the spatial planning problem is to maximise the likelihood  
308 of the species’ persistence, then the most appropriate approach would be to include a persistence metric  
309 (*e.g.* population viability; metapopulation capacity) within the objective function. In this case, population  
310 connectivity together with fecundity, mortality and survival are included as a metapopulation model within

311 the optimisation process. Currently, this is only realistic computationally for small problems (tens to hundreds  
312 of planning units) because the algorithm needs to calculate the performance metric very fast for simulated  
313 annealing to deliver good answers reasonably quickly. For example, Chollett *et al.* (2017) used a genetic  
314 algorithm to optimize an MPA network for maximum population persistence and fisheries yield, but this  
315 approach took 2 days on a high performance computing cluster which equates to ~300 days of single processor  
316 computing time. Even with powerful computational methods, such as integer linear programming (Beyer *et*  
317 *al.* 2016; Hanson *et al.* 2017), the problem formulation would be challenging as the performance metric of  
318 interest may vary non-linearly. Connectivity-based objective functions and their implementation in decision  
319 support software is a research priority.

## 320 Making decisions: models, matrices and methods

321 Most data for the above methods focus on single species, yet many protected areas are designed to protect a  
322 diversity of species. There are many strategies for combining single-species connectivity data into a single  
323 multi-species connectivity matrix. Examples include taking the arithmetic or geometric means of multiple  
324 connectivity matrices, or connectivity metrics derived from them (Melià *et al.* 2016; D'Aloia *et al.* 2017).  
325 Others have calculated the probability of at least one species, or all species being connected (Jonsson, Nilsson  
326 Jacobi & Moksnes 2016; Magris *et al.* 2016). However, in all these cases, generating multi-species metrics  
327 or connectivity matrices resulted in some level of compromise that was suboptimal for a single species. If  
328 targeting conservation features, the most efficient solutions will be achieved by using single species conservation  
329 features that are representative of multiple life-stages and species with varying dispersal traits (Beger *et al.*  
330 2015; Magris *et al.* 2016; Albert *et al.* 2017; D'Aloia *et al.* 2017). Alternatively, if the connectivity data  
331 are used to modify the boundary definitions, then a single connectivity dataset (*e.g.* edge list or matrix)  
332 per Marxan optimization must be used. Therefore, users are forced to calculate multi-species connectivity  
333 metrics, or run Marxan once per species and potentially combine the outputs. In all cases the consequences  
334 or trade-offs of the chosen strategy should be evaluated.

335 If the sole conservation objective is to maximize among-reserve connectivity, then modifying the boundary  
336 definitions and locking in existing reserves will likely produce the most efficient results. However, targeting  
337 connectivity features allows for more flexibility in objectives such as protecting areas that are important to  
338 maintain entire ecosystems (not just in reserves), avoiding areas with invasive species, or targetting areas  
339 with higher larval or adult spillover into unprotected sites. While these approaches may be slightly redundant,  
340 they are not mutually exclusive. Regardless of the data or method(s) that are chosen, post-hoc evaluations  
341 should be used to evaluate competing strategies.

342 The spatial and temporal scales of the connectivity data should be considered in all approaches. Ideally,  
343 connectivity should be quantified at the spatial scale of the planning units because the assumptions needed  
344 for rescaling can lead to erroneous results. The temporal scale of connectivity data should be aligned with  
345 the conservation objectives, such as providing demographic (*e.g.*, single generation movement) connectivity  
346 or safeguarding long-term gene flow (*e.g.*, many 100s of generations). Additionally, the planning area should  
347 extend beyond jurisdictional boundaries and the focus area to avoid edge effects which are particularly  
348 consequential for connectivity data (*e.g.* important source habitat may exist just beyond jurisdictional  
349 boundaries or focus areas).

## Post-hoc evaluation

None of the above methods, aside from customising the objective function, guarantee that population viability (see Tear *et al.* 2005) or metapopulation growth rate ( $\lambda_M >$ ; Figure 3) are maximised. This is because these methods are targeting the connectivity process per se but not the population outcomes explicitly. The use of simulated annealing for optimising complex performance metrics (*e.g.* population viability) currently has computational limitations. Therefore, the feasible solution to determine how well the final plan captures metapopulation outcomes in the analysis, or to compare the performance between plans, is to undertake post-hoc evaluations. The post-hoc analysis is structured as a sensitivity analysis, where multiple solutions are generated and compared to assess their performance in achieving the chosen connectivity objective. These solutions can be the result of varying Marxan parameters such as the conservation targets, the boundary length modifier, connectivity metrics, and/or costs, or the post-hoc analysis can compare individual spatial plans from the full ensemble created by the same input parameters and the simulated annealing process (Nicholson & Possingham 2006).

To illustrate this approach, we present a post-hoc sensitivity analysis to determine the optimal connectivity target multiplier value,  $C$ , across four connectivity metrics (Figure 3). This same approach could also be adapted for exploring the impact of using different methods, targets, thresholds, or data. We vary  $C$  in different Marxan scenarios using four different conservation features (in degree, betweenness centrality, Google PageRank and avoidance area recipients) to determine the impact on cost, and metapopulation growth. In this case, we used an in-reserve metapopulation growth rate greater than 1 (*e.g.* Figueira & Crowder 2006; Hale, Treml & Swearer 2015; [marxanconnect.ca](http://marxanconnect.ca)) as our ecologically relevant conservation objective. If the growth rate is lower than 1, the entire metapopulation would go extinct without external supplementation; however, this method requires detailed biological information. In this example, using “in degree” as a conservation feature increases the metapopulation growth rate linearly with cost, which has limited applicability. Both “betweenness centrality” and “Google PageRank” perform quite well with the latter being slightly better, likely because it considers the weight (*i.e.* strength) of the linkages. With “Google PageRank” as a conservation feature and  $C = 3$  (*i.e.* conservation target of 30%), this example species is predicted to have a metapopulation growth rate  $> 1$  and nearly the same level of growth as if the entire ecosystem was protected. In this example, “avoidance area recipient” performs extremely poorly because: 1) there was no parameter or mechanism in the population model that represented a reason to avoid the avoidance areas (*e.g.* impact of invasive species); and 2) the “avoidance area recipient” metric should always be discretized (*i.e.* low values of “avoidance area recipient” are desirable) since using the continuous metric would promote the selection of areas that receive the most propagules from the avoidance area.

In the second case, connectivity metrics can be calculated for individual conservation plans with varying spatial configurations that all meet the specified objective function (*i.e.* have the same input parameters). To identify the most dissimilar Marxan solutions in an analysis, a dissimilarity matrix (*i.e.* dendrogram) can be created using the Marxan cluster analysis function (Linke *et al.* 2011). The chosen metric can then be calculated for each plan to evaluate which spatial configuration best achieves the connectivity objective.

There are several different types of post-hoc assessments that can be performed, such as pattern-based assessments, evaluating metapopulation capacity, or using system models. In pattern-based assessments, for example, Krueck *et al.* (2017) developed metrics using local larval retention, import connectivity and export connectivity from connectivity matrices which can be calculated in a post-hoc analysis to evaluate how

Operationalizing connectivity in spatial planning

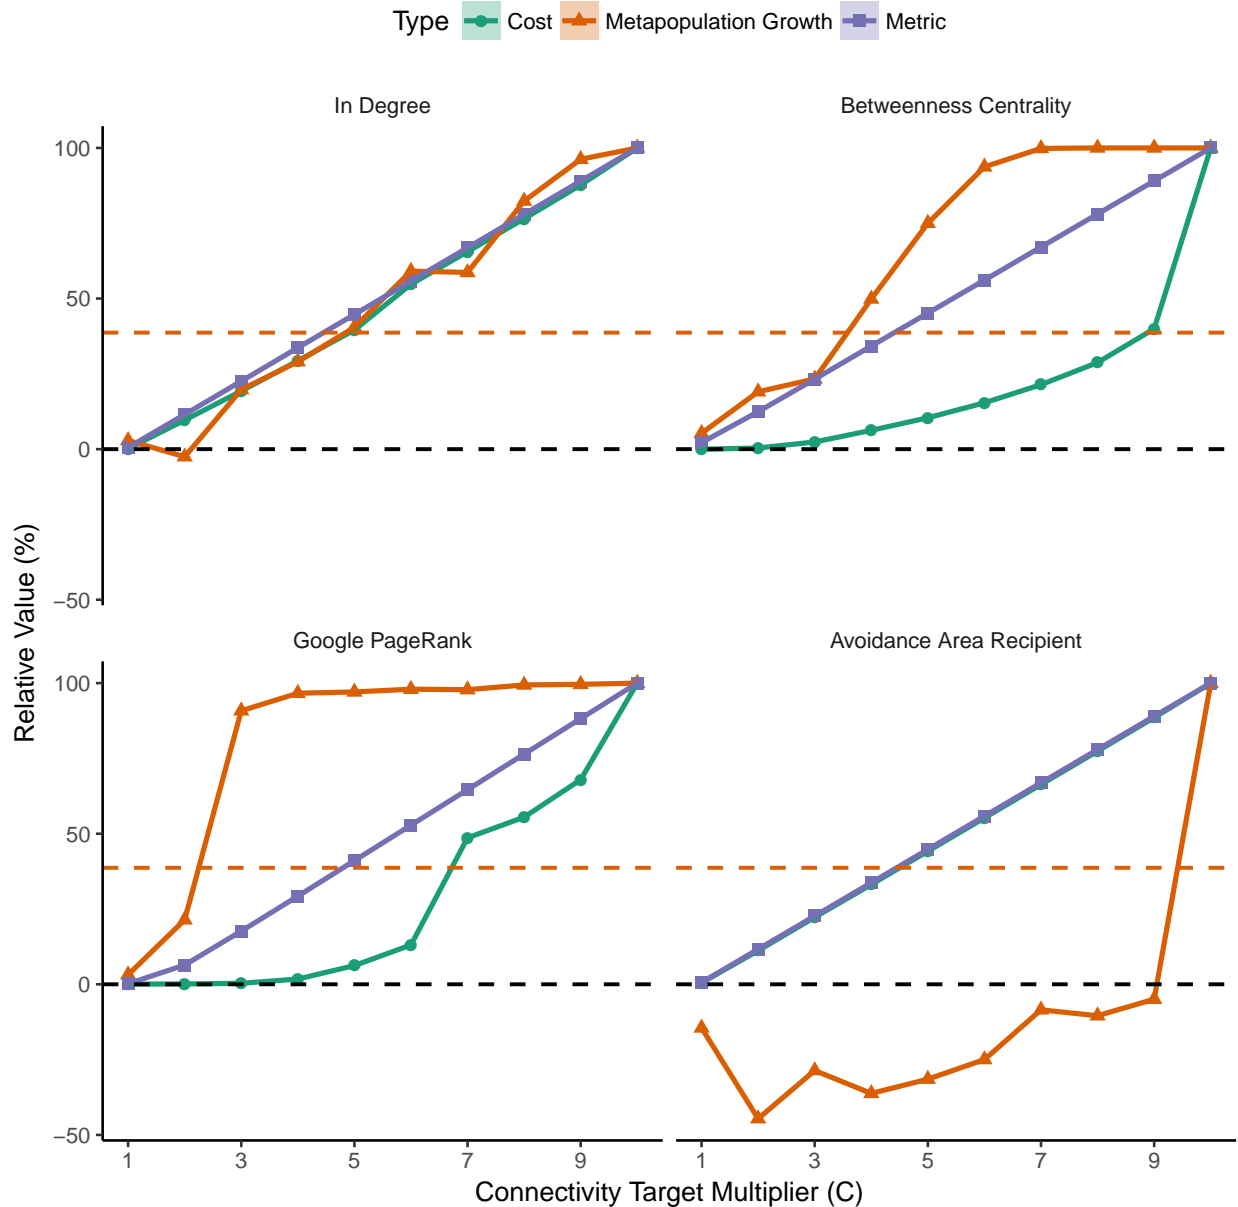

Figure 3: Connectivity target multiplier (C) sensitivity analysis, where the sum of the connectivity metric, estimated metapopulation growth rate ( $\lambda_M$ ), and cost of the selected network (mean  $\pm$  S.E.,  $n = 10$ ) are plotted as relative percentages of their maximum values. Four connectivity metrics are used as examples: In Degree, Betweenness Centrality, Google Page Rank and Avoidance Area Recipient. The black dashed line is the value of the metric, growth rate, and cost of the selected network if the connectivity based conservation feature is not included. The orange dashed line indicates where  $\lambda_M = 1$ , or the point at which the protected area network is self sustaining. The calculation of  $\lambda_M$ , included here for demonstration purposes only, is estimated using the leading eigenvalue of a theoretical connectivity matrix which includes theoretical fecundity and survival (*i.e.* flow matrix). Full details on the generation of this figure can be found on [marxanconnect.ca](http://marxanconnect.ca).

391 different conservation plans meet both conservation and fisheries objectives across protected and unprotected  
392 sites. Graph theoretic metric(s) or those that better capture population persistence can also be used, but few  
393 examples of their use in post-hoc analyses currently exist. In one example, Laita, Kotiaho, Monkkonen et al.  
394 (2011) explored how network connectivity measures (*i.e.* correlation length, expected cluster size, landscape  
395 coincidence probability, area-weighted flux, integral index of connectivity and probability of connectivity)  
396 changed with the addition of woodland key habitats to reserve networks in Finland. However, they highlight  
397 the need for a more detailed understanding of the caveats and justifications of these measures before they  
398 can be used for conservation purposes.

399 If additional demographic information of species, such as survival and mortality, is known, then the suggested  
400 course of action is to evaluate potential reserve networks using metapopulation models. With these models,  
401 it is possible to make predictions regarding the ecological outcomes such as the probability of going extinct  
402 in a certain time frame (Boyce 1992), the capacity to recover from a disturbance (Figueira & Crowder  
403 2006), metapopulation lifetime (Kininmonth *et al.* 2010), probability of metapopulation extinction (Bode,  
404 Burrage & Possingham 2008), or other possible ecologically relevant conservation objectives. While increasing  
405 connectivity in reserve networks is generally desired; without models of metapopulation dynamics, connectivity  
406 risks becoming a relatively meaningless objective like “percent area covered by protected area” (Tear *et al.*  
407 2005).

408 Lastly, system models are designed to simulate one or more processes related to the conservation objectives  
409 (*e.g.* prioritize stepping stones) or overall goals (*e.g.* population persistence). White *et al.* (2014) used  
410 population models to compare the performance of Marxan solutions generated with and without the inclusion  
411 of static larval connectivity information by calculating the equilibrium biomass (in and outside of protected  
412 areas) and fishery yield of the different spatial configurations in California. Similarly, tools such as the  
413 BESTMPA R package (Daigle, Monaco & Elgin 2017), allow users to test commercial fishery costs and  
414 benefits from various spatial conservation scenarios using a spatially explicit metapopulation model that  
415 interacts with fishing behaviour.

416 No matter what post-hoc analysis approach is used, selecting the most appropriate metric(s), understanding  
417 the caveats of the metric, and making ad hoc assumptions on how the user expects the metric to perform  
418 for the specified application is extremely important for interpreting and comparing the outcomes of these  
419 different measures (Pascual-Hortal & Saura 2006; see Laita, Kotiaho & Mönkkönen 2011). In conservation  
420 plans that incorporate existing protected areas, it is also important to evaluate the contribution of newly  
421 selected sites to the conservation objective, which can be accomplished by performing the post-hoc analysis  
422 with and without considering existing reserves (*i.e.* a gap analysis). This can reveal important information  
423 on the performance of the existing reserve system and can help ensure complementarity between the existing  
424 network and potential sites for protected area expansion.

## 425 **Marxan Connect**

426 Because we recognize that there is considerable investment in Marxan-based prioritization, Marxan Connect  
427 was designed to help conservation practitioners incorporate connectivity into existing Marxan analyses. It  
428 guides users through:

- 429 1. Identifying and loading appropriate spatial data



- 430 a. Planning units
- 431 b. Focus areas
- 432 c. Avoidance areas
- 433 2. Identifying and loading connectivity data
- 434 a. Demographic-based
- 435 b. Landscape-based
- 436 3. Calculates connectivity metrics or generates spatial dependencies
- 437 a. Conservation features method
- 438 b. Connectivity as spatial dependencies method
- 439 4. Optionally discretizes conservation features and exports Marxan files
- 440 5. Running Marxan
- 441 6. Evaluate results with basic plotting options

442 Marxan Connect allows users to export data products (*e.g.* connectivity metrics, Marxan files, etc.) at any of  
443 the above steps to enable users to base their workflow in or outside Marxan Connect.

444 For the landscape connectivity approach, Marxan Connect calculates connectivity metrics from networks  
445 based either on Euclidean distance or least-cost path between the centroid of planning units. However, other  
446 software packages such as Circuitscape (McRae, Shah & Mohapatra 2009) and Conefor (Saura & Torné 2009)  
447 currently provide a richer set of options and specialized methods. These software packages can be used to  
448 generate custom conservation features or connectivity matrices both of which can then be used in Marxan  
449 Connect. For example, one could generate a network using current density using Circuitscape and input the  
450 resulting connectivity matrix into Marxan Connect to generate conservation features or spatial dependencies.

451 For a user opting to use non-Marxan spatial prioritization software such as Zonation (Lehtomäki & Moilanen  
452 2013) or prioritizr (Hanson *et al.* 2017), there is a high degree of compatibility with Marxan Connect. The  
453 approach of targeting conservation features is compatible with any spatial planning software. Certain software  
454 packages such as prioritizr can read Marxan-formatted files directly; therefore, Marxan Connect could be  
455 used with prioritizr to generate connectivity-related input files. It also appears that modifying the boundary  
456 definitions with connectivity data could be performed with prioritizr's "add\_boundary\_penalties" function.  
457 This is in addition to prioritizr's "add\_connected\_constraints" function which tends to select unbroken  
458 chains of physically linked planning units (Önal & Briers 2006).

## 459 Conclusions

460 The approaches for including connectivity in spatial planning are rapidly evolving and few "best practices"  
461 exist. Here, we provide some guidance on methods, data sources, and models, as well as a novel open-source  
462 tool to support these methods. However, connectivity-based conservation targets are ecologically meaningless  
463 unless placed in the context of broader ecologically relevant conservation objectives such as population  
464 viability, expected time to extinction, or metapopulation growth rate. Similarly, connectivity is usually only  
465 one criterion in planning, and will be considered alongside area-based targets, socio-economic goals, and  
466 multi-species requirements.

467 Connectivity is a complex topic with abundant terminology and a diversity of methods that require substantial  
468 effort to understand and apply to spatial prioritization scenarios correctly (Beger *et al.* in prep). If

469 connectivity is to widely inform protected area planning, communication channels between experts in the  
470 fields of connectivity and population dynamics and planners must be improved. The experts, in particular,  
471 should make their research outcomes more accessible to practitioners by providing openly available data  
472 and clarifying definitions, assumptions, and limitations. For example, the term “connectivity matrix”, while  
473 central to the concept of connectivity, does not provide enough information to spatial planners or even to  
474 other connectivity experts to incorporate connectivity into spatial planning initiatives. With Marxan Connect,  
475 we hope to offer standardized methods and terminology to help close this research-implementation gap.

476 While Marxan Connect represents an advance in facilitating the incorporation of connectivity into the design  
477 of protected areas, it does not guarantee that reserves will be “well connected”. Only post-hoc evaluation of  
478 the reserve design related to ecologically relevant conservation objective(s) can inform practitioners of the  
479 resilience and persistence of targeted populations. However, the tools provided in Marxan Connect greatly  
480 improve the likelihood that a selected reserve design will adequately meet those conservation objective(s).

## 481 **Acknowledgements**

482 Funding for the development of this software was provided by the Natural Sciences and Engineering Research  
483 Council of Canada through the Canadian Healthy Oceans Network (NSERC NETGP 468437-14), and  
484 the Discovery Grants program (NSERC DG 34851-2012), and the University of Queensland. Additional  
485 contributions were provided by the University of Leeds, The Nature Conservancy, Dalhousie University, The  
486 University of Melbourne, and the Australian Research Council - Centre of Excellence for Environmental  
487 Decisions (CEED). This project builds on the existing Marxan (Ball, Possingham & Watts 2009) software  
488 and would not be possible without the hard work of Ian Ball, Matt Watts, and Hugh Possingham. The  
489 authors also wish to thank Ryan Stanley, Marco Andreello, and Jo Clarke for constructive feedback on early  
490 versions of the software or manuscript.

## 491 **Supplementary Material:**

492 The source code for the software and website can be found at <https://github.com/remi-daigle/MarxanConnect>.  
493 There are repeated references in the tutorial and glossary section of [marxanconnect.ca](http://marxanconnect.ca), the website may evolve  
494 as the software is improved. The original publication version of the website and app have been archived on  
495 Zenodo (Daigle et al. 2018 *This will be archived and added to references upon acceptance of the manuscript*)

## 496 **Author’s contributions**

497 AM and MB conceived the application and acquired funding; RD developed the application and website;  
498 RD, AM, AB, and MB worked on the initial development and early testing of the application. All authors  
499 made significant contributions to the later development stages of the application and website. All authors  
500 contributed critically to making improvements to the application, drafting the manuscript, and provided final  
501 approval for publication.

## References

- 503 Albert, C.H., Rayfield, B., Dumitru, M. & Gonzalez, A. (2017). Applying network theory to prioritize  
504 multi-species habitat networks that are robust to climate and land-use change. *Conserv. Biol.*
- 505 Ardron, J.A., Possingham, H.P. & Klein, C.J. (2010). Marxan good practices handbook. *Victoria, BC.*
- 506 Álvarez-Romero, J.G., Munguía-Vega, A., Beger, M., Del Mar Mancha-Cisneros, M., Suárez-Castillo, A.N.,  
507 Gurney, G.G., Pressey, R.L., Gerber, L.R., Morzaria-Luna, H.N., Reyes-Bonilla, H., Adams, V.M., Kolb, M.,  
508 Graham, E.M., VanDerWal, J., Castillo-López, A., Hinojosa-Arango, G., Petatán-Ramírez, D., Moreno-Baez,  
509 M., Godínez-Reyes, C.R. & Torre, J. (2018). Designing connected marine reserves in the face of global  
510 warming. *Glob. Chang. Biol.*, **24**, e671–e691.
- 511 Ball, I.R., Possingham, H.P. & Watts, M. (2009). Marxan and relatives: Software for spatial conservation  
512 prioritisation. *Spatial conservation prioritisation: quantitative methods and computational tools. Oxford*  
513 *University Press, Oxford*, 185–195.
- 514 Barnes, M.D., Glew, L., Wyborn, C. & Craigie, I.D. (2018). Prevent perverse outcomes from global protected  
515 area policy. *Nat Ecol Evol.*
- 516 Beger, M., Grantham, H.S., Pressey, R.L., Wilson, K.A., Peterson, E.L., Dorfman, D., Mumby, P.J., Lourival,  
517 R., Brumbaugh, D.R. & Possingham, H.P. (2010a). Conservation planning for connectivity across marine,  
518 freshwater, and terrestrial realms. *Biol. Conserv.*, **143**, 565–575.
- 519 Beger, M., Selkoe, K.A., Treml, E., Barber, P.H., Heyden, S. von der, Crandall, E.D., Toonen, R.J. & Riginos,  
520 C. (2014). Evolving coral reef conservation with genetic information. *Bull. Mar. Sci.*, **90**, 159–185.
- 521 Beger, M., Linke, S., Watts, M., Game, E., Treml, E., Ball, I. & Possingham, H.P. (2010b). Incorporat-  
522 ing asymmetric connectivity into spatial decision making for conservation: Asymmetric connectivity in  
523 conservation planning. *Conservation Letters*, **3**, 359–368.
- 524 Beger, M., McGowan, J., Treml, E.A., Green, A.L., White, A.T., Wolff, N.H., Klein, C.J., Mumby, P.J. &  
525 Possingham, H.P. (2015). Integrating regional conservation priorities for multiple objectives into national  
526 policy. *Nat. Commun.*, **6**, 8208.
- 527 Beyer, H.L., Dujardin, Y., Watts, M.E. & Possingham, H.P. (2016). Solving conservation planning problems  
528 with integer linear programming. *Ecol. Modell.*, **328**, 14–22.
- 529 Bode, M., Bode, L. & Armsworth, P.R. (2006). Larval dispersal reveals regional sources and sinks in the  
530 great barrier reef. *Mar. Ecol. Prog. Ser.*, **308**, 17–25.
- 531 Bode, M., Burrage, K. & Possingham, H.P. (2008). Using complex network metrics to predict the persistence  
532 of metapopulations with asymmetric connectivity patterns. *Ecol. Modell.*, **214**, 201–209.
- 533 Boyce, M.S. (1992). Population viability analysis. *Annu. Rev. Ecol. Syst.*, **23**, 481–506.
- 534 Bracis, C.I. (2015). *Incorporating cognition into models of animal movement and predator–prey interaction.*  
535 PhD thesis thesis,
- 536 Brown, C.J., Harborne, A.R., Paris, C.B. & Mumby, P.J. (2016). Uniting paradigms of connectivity in marine

- 537 ecology. *Ecology*, **97**, 2447–2457.
- 538 Bunn, A.G., Urban, D.L. & Keitt, T.H. (2000). Landscape connectivity: A conservation application of graph  
539 theory. *J. Environ. Manage.*, **59**, 265–278.
- 540 Cagnacci, F., Boitani, L., Powell, R.A. & Boyce, M.S. (2010). Animal ecology meets GPS-based radiotelemetry:  
541 A perfect storm of opportunities and challenges. *Philos. Trans. R. Soc. Lond. B Biol. Sci.*, **365**, 2157–2162.
- 542 Chetkiewicz, C.-L.B. & Boyce, M.S. (2009). Use of resource selection functions to identify conservation  
543 corridors. *J. Appl. Ecol.*, **46**, 1036–1047.
- 544 Chollett, I., Garavelli, L., O’Farrell, S., Cherubin, L., Matthews, T.R., Mumby, P.J. & Box, S.J. (2017). A  
545 genuine win-win: Resolving the ‘conserve or catch’ conflict in marine reserve network design. *Conservation*  
546 *Letters*, **10**, 555–563.
- 547 Cowen, R.K., Lwiza, K.M., Sponaugle, S., Paris, C.B. & Olson, D.B. (2000). Connectivity of marine  
548 populations: Open or closed? *Science*, **287**, 857–859.
- 549 Daigle, R.M. & Metaxas, A. (2012). Modeling of the larval response of green sea urchins to thermal  
550 stratification using a random walk approach. *J. Exp. Mar. Bio. Ecol.*, **438**, 14–23.
- 551 Daigle, R.M., Chassé, J. & Metaxas, A. (2016). The relative effect of behaviour in larval dispersal in a low  
552 energy embayment. *Prog. Oceanogr.*, **144**, 93–117.
- 553 Daigle, R.M., Monaco, C.J. & Elgin, A.K. (2017). An adaptable toolkit to assess commercial fishery costs  
554 and benefits related to marine protected area network design. *F1000Res.*, **4**.
- 555 Dunn, J.E. & Gipson, P.S. (1977). Analysis of radio telemetry data in studies of home range. *Biometrics*, **33**,  
556 85–101.
- 557 D’Aloia, C.C., Daigle, R.M., Côté, I.M., Curtis, J.M.R., Guichard, F. & Fortin, M.-J. (2017). A multiple-  
558 species framework for integrating movement processes across life stages into the design of marine protected  
559 areas. *Biol. Conserv.*, **216**, 93–100.
- 560 Fall, A., Fortin, M.-J., Manseau, M. & O’Brien, D. (2007). Spatial graphs: Principles and applications for  
561 habitat connectivity. *Ecosystems*, **10**, 448–461.
- 562 Figueira, W.F. & Crowder, L.B. (2006). Defining patch contribution in source-sink metapopulations: The  
563 importance of including dispersal and its relevance to marine systems. *Popul. Ecol.*, **48**, 215–224.
- 564 Hale, R., Treml, E.A. & Swearer, S.E. (2015). Evaluating the metapopulation consequences of ecological  
565 traps. *Proc. Biol. Sci.*, **282**, 20142930.
- 566 Hand, B.K., Lowe, W.H., Kovach, R.P., Muhlfeld, C.C. & Luikart, G. (2015). Landscape community genomics:  
567 Understanding eco-evolutionary processes in complex environments. *Trends Ecol. Evol.*, **30**, 161–168.
- 568 Hanson, J.O., Schuster, R., Morrell, N., Strimas-Mackey, M., Watts, M.E., Arcese, P., Bennett, J. &  
569 Possingham, H.P. (2017). Prioritizr: Systematic conservation prioritization in R.
- 570 Harrison, H.B., Williamson, D.H., Evans, R.D., Almany, G.R., Thorrold, S.R., Russ, G.R., Feldheim, K.A.,  
571 Herwerden, L. van, Planes, S., Srinivasan, M., Berumen, M.L. & Jones, G.P. (2012). Larval export from

- 572 marine reserves and the recruitment benefit for fish and fisheries. *Curr. Biol.*, **22**, 1023–1028.
- 573 Hussey, N.E., Kessel, S.T., Aarestrup, K., Cooke, S.J., Cowley, P.D., Fisk, A.T., Harcourt, R.G., Holland,  
574 K.N., Iverson, S.J., Kocik, J.F., Mills Flemming, J.E. & Whoriskey, F.G. (2015). ECOLOGY. aquatic animal  
575 telemetry: A panoramic window into the underwater world. *Science*, **348**, 1255642.
- 576 Iwamura, T., Possingham, H.P., Chadès, I., Minton, C., Murray, N.J., Rogers, D.I., Treml, E.A. & Fuller, R.A.  
577 (2013). Migratory connectivity magnifies the consequences of habitat loss from sea-level rise for shorebird  
578 populations. *Proc. Biol. Sci.*, **280**, 20130325.
- 579 Jonsson, P.R., Nilsson Jacobi, M. & Moksnes, P.-O. (2016). How to select networks of marine protected areas  
580 for multiple species with different dispersal strategies (L. Beaumont, Ed.). *Divers. Distrib.*, **22**, 161–173.
- 581 Kininmonth, S., Drechsler, M., Johst, K. & Possingham, H.P. (2010). Metapopulation mean life time within  
582 complex networks. *Mar. Ecol. Prog. Ser.*, **417**, 139–149.
- 583 Koen, E.L., Bowman, J., Sadowski, C. & Walpole, A.A. (2014). Landscape connectivity for wildlife:  
584 Development and validation of multispecies linkage maps (A. Tatem, Ed.). *Methods Ecol. Evol.*, **5**, 626–633.
- 585 Kool, J.T., Moilanen, A. & Treml, E.A. (2013). Population connectivity: Recent advances and new  
586 perspectives. *Landsc. Ecol.*, **28**, 165–185.
- 587 Krueck, N.C., Ahmadi, G.N., Green, A., Jones, G.P., Possingham, H.P., Riginos, C., Treml, E.A. & Mumby,  
588 P.J. (2017). Incorporating larval dispersal into MPA design for both conservation and fisheries. *Ecol. Appl.*,  
589 **27**, 925–941.
- 590 Laita, A., Kotiaho, J.S. & Mönkkönen, M. (2011). Graph-theoretic connectivity measures: What do they tell  
591 us about connectivity? *Landsc. Ecol.*, **26**, 951–967.
- 592 Lehtomäki, J. & Moilanen, A. (2013). Methods and workflow for spatial conservation prioritization using  
593 zonation. *Environmental Modelling & Software*, **47**, 128–137.
- 594 Linke, S., Watts, M., Stewart, R. & Possingham, H.P. (2011). Using multivariate analysis to deliver  
595 conservation planning products that align with practitioner needs. *Ecography*, **34**, 203–207.
- 596 Lowe, W.H. & Allendorf, F.W. (2010). What can genetics tell us about population connectivity? *Mol. Ecol.*,  
597 **19**, 3038–3051.
- 598 Magris, R.A., Andreollo, M., Pressey, R.L., Mouillot, D., Dalongeville, A., Jacobi, M.N. & Manel, S. (2018).  
599 Biologically representative and well-connected marine reserves enhance biodiversity persistence in conservation  
600 planning. *CONSERVATION LETTERS*, **96**, e12439.
- 601 Magris, R.A., Treml, E.A., Pressey, R.L. & Weeks, R. (2016). Integrating multiple species connectivity and  
602 habitat quality into conservation planning for coral reefs. *Ecography*, **39**, 649–664.
- 603 Maina, J.M., Jones, K.R., Hicks, C.C., McClanahan, T.R., Watson, J.E.M., Tuda, A.O. & Andréfouët, S.  
604 (2015). Designing Climate-Resilient marine protected area networks by combining remotely sensed coral reef

- 605 habitat with coastal Multi-Use maps. *Remote Sensing*, **7**, 16571–16587.
- 606 Manel, S. & Holderegger, R. (2013). Ten years of landscape genetics. *Trends Ecol. Evol.*, **28**, 614–621.
- 607 Margules, C.R. & Pressey, R.L. (2000). Systematic conservation planning. *Nature*, **405**, 243–253.
- 608 Marrotte, R.R., Bowman, J., Brown, M.G.C., Cordes, C., Morris, K.Y., Prentice, M.B. & Wilson, P.J. (2017).  
609 Multi-species genetic connectivity in a terrestrial habitat network. *Mov Ecol*, **5**, 21.
- 610 Mazor, T., Beger, M., McGowan, J., Possingham, H.P. & Kark, S. (2016). The value of migration information  
611 for conservation prioritization of sea turtles in the mediterranean: Conservation planning of migratory species.  
612 *Glob. Ecol. Biogeogr.*, **25**, 540–552.
- 613 McGowan, J., Smith, R.J., Di Marco, M., Clarke, R.H. & Possingham, H.P. (2017a). An evaluation of marine  
614 important bird and biodiversity areas in the context of spatial conservation prioritization. *Conservation*  
615 *Letters*.
- 616 McGowan, J., Beger, M., Lewison, R.L., Harcourt, R., Campbell, H., Priest, M., Dwyer, R.G., Lin, H.-Y.,  
617 Lentini, P., Dudgeon, C., McMahon, C., Watts, M. & Possingham, H.P. (2017b). Integrating research using  
618 animal-borne telemetry with the needs of conservation management (J. du Toit, Ed.). *J. Appl. Ecol.*, **54**,  
619 423–429.
- 620 McNeil, F.I. & Crossman, E.J. (1979). Fin clips in the evaluation of stocking programs for muskellunge, esox  
621 masquinongy. *Trans. Am. Fish. Soc.*, **108**, 335–343.
- 622 McRae, B.H. & Nürnberger, B. (2006). ISOLATION BY RESISTANCE. *Evolution*, **60**, 1551–1561.
- 623 McRae, B.H., Shah, V.B. & Mohapatra, T.K. (2009). Circuitscape user guide. *The University of California*,  
624 *Santa Barbara*.
- 625 Melià, P., Schiavina, M., Rossetto, M., Gatto, M., Frascchetti, S. & Casagrandi, R. (2016). Looking for  
626 hotspots of marine metacommunity connectivity: A methodological framework. *Sci. Rep.*, **6**, 23705.
- 627 Metaxas, A. (2001). Behaviour in flow: Perspectives on the distribution and dispersion of meroplanktonic  
628 larvae in the water column. *Can. J. Fish. Aquat. Sci.*, **58**, 86–98.
- 629 Metaxas, A. & Saunders, M. (2009). Quantifying the ‘bio-’ components in biophysical models of larval  
630 transport in marine benthic invertebrates: Advances and pitfalls. *Biol. Bull.*, **216**, 257–272.
- 631 Minor, E.S., McDonald, R.I., Treml, E.A. & Urban, D.L. (2008). Uncertainty in spatially explicit population  
632 models. *Biol. Conserv.*, **141**, 956–970.
- 633 Moilanen, A., Wilson, K.A. & Possingham, H. (2009). *Spatial conservation prioritization: Quantitative*  
634 *methods and computational tools*. Oxford University Press.
- 635 Mora, C., Andréfouët, S., Costello, M.J., Kranenburg, C., Rollo, A., Veron, J., Gaston, K.J. & Myers, R.A.  
636 (2006). Coral reefs and the global network of marine protected areas. *Science*, **312**, 1750–1751.
- 637 Nicholson, E. & Possingham, H.P. (2006). Objectives for Multiple-Species conservation planning. *Conserv.*  
638 *Biol.*, **20**, 871–881.
- 639 Önal, H. & Briers, R.A. (2006). Optimal selection of a connected reserve network. *Oper. Res.*, **54**, 379–388.
- 640 Palumbi, S.R. (2003). Population genetics, demographic connectivity, and the design of marine reserves. *Ecol.*



- 641 *Appl.*, **13**, S146–S158.
- 642 Paris, C.B., Chérubin, L.M. & Cowen, R.K. (2007). Surfing, spinning, or diving from reef to reef: Effects on  
643 population connectivity. *Mar. Ecol. Prog. Ser.*, **347**, 285–300.
- 644 Pascual-Hortal, L. & Saura, S. (2006). Comparison and development of new graph-based landscape connectivity  
645 indices: Towards the prioritization of habitat patches and corridors for conservation. *Landsc. Ecol.*, **21**, 959–967.
- 646 Pereira, J., Saura, S. & Jordán, F. (2017). Single-node vs. multi-node centrality in landscape graph analysis:  
647 Key habitat patches and their protection for 20 bird species in NE Spain (F. Parrini, Ed.). *Methods Ecol.*  
648 *Evol.*, **8**, 1458–1467.
- 649 Pritchard, J.K., Stephens, M. & Donnelly, P. (2000). Inference of population structure using multilocus  
650 genotype data. *Genetics*, **155**, 945–959.
- 651 Rayfield, B., Fortin, M.-J. & Fall, A. (2010). The sensitivity of least-cost habitat graphs to relative cost  
652 surface values. *Landsc. Ecol.*, **25**, 519–532.
- 653 Ricketts, T.H. (2001). The matrix matters: Effective isolation in fragmented landscapes. *Am. Nat.*, **158**,  
654 87–99.
- 655 Roughgarden, J., Gaines, S. & Possingham, H. (1988). Recruitment dynamics in complex life cycles. *Science*,  
656 **241**, 1460–1466.
- 657 Runge, C.A., Tulloch, A.I.T., Possingham, H.P., Tulloch, V.J.D. & Fuller, R.A. (2016). Incorporating  
658 dynamic distributions into spatial prioritization (N. Roura-Pascual, Ed.). *Divers. Distrib.*, **22**, 332–343.
- 659 Saenz-Agudelo, P., Jones, G.P., Thorrold, S.R. & Planes, S. (2009). Estimating connectivity in marine  
660 populations: An empirical evaluation of assignment tests and parentage analysis under different gene flow  
661 scenarios. *Mol. Ecol.*, **18**, 1765–1776.
- 662 Saura, S. & Pascual-Hortal, L. (2007). A new habitat availability index to integrate connectivity in landscape  
663 conservation planning: Comparison with existing indices and application to a case study. *Landsc. Urban*  
664 *Plan.*, **83**, 91–103.
- 665 Saura, S. & Torné, J. (2009). Conefor sensinode 2.2: A software package for quantifying the importance of  
666 habitat patches for landscape connectivity. *Environmental Modelling & Software*, **24**, 135–139.
- 667 Schumaker, N.H. (1996). Using landscape indices to predict habitat connectivity. *Ecology*, **77**, 1210–1225.
- 668 Scott, T.G. (1942). Ear tags on mice. *J. Mammal.*, **23**, 339.
- 669 Smith, J. & Metaxas, A. (2018). A decision tree that can address connectivity in the design of marine  
670 protected area networks (MPAN). *Mar. Policy*, **88**, 269–278.
- 671 Tear, T.H., Kareiva, P., Angermeier, P.L., Comer, P., Czech, B., Kautz, R., Landon, L., Mehlman, D.,  
672 Murphy, K., Ruckelshaus, M., Scott, J.M. & Wilhere, G. (2005). How much is enough? The recurrent problem  
673 of setting measurable objectives in conservation. *Bioscience*, **55**, 835–849.
- 674 Thomas, J.W. & Marburger, R.G. (1964). Colored leg markers for wild turkeys. *J. Wildl. Manage.*, **28**,  
675 552–555.
- 676 Tischendorf, L. & Fahrig, L. (2000). On the usage and measurement of landscape connectivity. *Oikos*, **90**,



677 7–19.

678 Treml, E.A., Ford, J.R., Black, K.P. & Swearer, S.E. (2015). Identifying the key biophysical drivers,  
679 connectivity outcomes, and metapopulation consequences of larval dispersal in the sea. *Mov Ecol*, **3**, 17.

680 Twigg, G.I. (1978). Marking mammals by tissue removal. *Animal marking*, pp. 109–118. Palgrave, London.

681 UNEP. (2010). TARGET 11 - technical rationale extended (provided in document COP/10/INF/12/Rev.1).  
682 *Convention on Biological Diversity*.

683 Urban, D. & Keitt, T. (2001). LANDSCAPE CONNECTIVITY: A GRAPH-THEORETIC PERSPECTIVE.  
684 *Ecology*, **82**, 1205–1218.

685 Voegeli, F.A., Smale, M.J., Webber, D.M., Andrade, Y. & O’Dor, R.K. (2001). Ultrasonic telemetry, tracking  
686 and automated monitoring technology for sharks. *The behavior and sensory biology of elasmobranch fishes:  
687 An anthology in memory of donald richard nelson*, pp. 267–282. Developments in environmental biology of  
688 fishes. Springer, Dordrecht.

689 Weeks, R. (2017). Incorporating seascape connectivity in conservation prioritisation. *PLoS One*, **12**, e0182396.

690 White, J.W., Schroeger, J., Drake, P.T. & Edwards, C.A. (2014). The value of larval connectivity information  
691 in the static optimization of marine reserve design. *Conservation Letters*, **7**, 533–544.

692 Whitfield Gibbons, J. & Andrews, K.M. (2004). PIT tagging: Simple technology at its best. *Bioscience;  
693 Oxford*, **54**, 447–454.

694 Wilson, K.A., Underwood, E.C., Morrison, S.A., Klausmeyer, K.R., Murdoch, W.W., Reyers, B., Wardell-  
695 Johnson, G., Marquet, P.A., Rundel, P.W., McBride, M.F., Pressey, R.L., Bode, M., Hoekstra, J.M.,  
696 Andelman, S., Looker, M., Rondinini, C., Kareiva, P., Shaw, M.R. & Possingham, H.P. (2007). Conserving  
697 biodiversity efficiently: What to do, where, and when. *PLoS Biol.*, **5**, e223.

698 Wilson, K.A., Cabeza, M. & Klein, C.J. (2009). Fundamental concepts of spatial conservation prioritization.  
699 *Spatial Conservation Prioritization: quantitative methods and computational tools*. Oxford, UK2009.

700 Zeller, K.A., Jennings, M.K., Vickers, T.W., Ernest, H.B., Cushman, S.A. & Boyce, W.M. (2018). Are all  
701 data types and connectivity models created equal? Validating common connectivity approaches with dispersal  
702 data (J. Bolliger, Ed.). *Divers. Distrib.*, **54**, 412.

703 Zeller, K.A., McGarigal, K. & Whiteley, A.R. (2012). Estimating landscape resistance to movement: A  
704 review. *Landsc. Ecol.*, **27**, 777–797.
